# Supplementary material for: Distinct metabolic profiling is correlated with bisexual flowers formation resulting from exogenous ethephon induction in melon (Cucumis melo L.)
Source: PeerJ. 2022 Mar 9;10:e13088. doi: 10.7717/peerj.13088 (PMC8917798; doi:10.7717/peerj.13088)
Supplement: Dataset S1 — Total of thirty plants with ethephon treatment were used for phenotypic statistics of the numbers of bisexual flowers in main stem, plant height, diameter of stem and length of internode. The raw data for each plant was listed. [file peerj-10-13088-s004.xlsx]

## Sheet: Numbers of bisexual flowers 
	‘Yangjiaocui-QX’-0ppm	‘Yangjiaocui-QX’-200ppm	‘Lvbao’-0ppm	‘Lvbao’-200ppm
1	0	7	0	6
2	0	5	0	7
3	0	7	0	6
4	0	7	0	7
5	0	4	0	6
6	0	5	0	7
7	0	7	0	6
8	0	9	0	7
9	0	6	0	6
10	0	8	0	7
11	0	7	0	7
12	0	5	0	7
13	0	6	0	7
14	0	8	0	6
15	0	7	0	6
16	0	6	0	7
17	0	6	0	6
18	0	6	0	7
19	0	9	0	7
20	0	7	0	7
21	0	9	0	7
22	0	5	0	6
23	0	9	0	7
24	0	4	0	7
25	0	8	0	7
26	0	5	0	7
27	0	7	0	7
28	0	6	0	6
29	0	6	0	7
30	0	6	0	6
Average	0	6.56±1.42a	0	6.63±0.5a

## Sheet: The height of plant
	‘Yangjiaocui-QX’-0ppm	‘Yangjiaocui-QX’-200ppm	‘Lvbao’-0ppm	‘Lvbao’-200ppm
1	98.42	75.82	169.9	130.67
2	112.1	81.59	161.96	117.4
3	99.88	75.6	161.68	117.84
4	110.71	80.5	153.43	144.58
5	110.41	88.8	163.4	131.66
6	100.28	76.87	150.74	120.31
7	102.26	83.77	159.61	124.19
8	118.2	71.77	148.76	110.83
9	109.28	70.61	160.08	144.79
10	107.08	89.72	160.18	128.79
11	105.51	71.6	151.39	130.97
12	104.55	105.9	153.37	136.52
13	105.91	75	155.19	132.74
14	117.36	73.03	165.68	119.32
15	107.44	75.97	163.05	120.39
16	105.93	95.05	152.34	129.68
17	112.02	64.17	155.17	122.43
18	111.42	68.35	170.53	138.53
19	113.2	85.46	163.02	125.26
20	112.97	71.4	167.31	131.13
21	113.66	87.61	146.59	120.46
22	113.6	79.13	149.4	134.59
23	113.85	91.39	141.51	125.5
24	103.88	77.24	156.75	113.62
25	106.24	96.01	164.19	122.63
26	106.54	80.44	162.77	115.45
27	113.82	86.13	159.97	140.36
28	109.7	78.28	155.87	134.69
29	106.55	105.59	177.08	130.22
30	101.94	76.65	151.53	124.2
Average	108.5±5.2a	81.32±10.2b	158.42±7.85a	127.34±8.84b

## Sheet: The diameter of stem
	‘Yangjiaocui-QX’-0ppm	‘Yangjiaocui-QX’-200ppm	‘Lvbao’-0ppm	‘Lvbao’-200ppm
1	4.84	5.95	7.68	8.71
2	4.86	6.16	7.87	8.85
3	5.07	4.58	6.69	7.55
4	5.1	6.72	7.64	8.15
5	5.27	5.89	7.69	7.77
6	4.82	5.97	7.83	7.62
7	5.56	7.05	8.29	8.22
8	4.21	5.66	6.42	8.26
9	5.31	6.44	8.93	8.45
10	4.85	5.56	7.88	8.49
11	5.08	6.57	7.6	7.58
12	4.88	5.67	6.86	7.76
13	4.76	6.29	7.7	8.1
14	5.34	5.89	7.48	7.58
15	5.14	5.17	7.83	7.41
16	5.22	5.94	6.88	7.36
17	5.64	5.89	7.27	7.71
18	4.52	5.73	8.39	7.67
19	5.1	5.51	7.35	7.34
20	5.04	6.35	7.86	7.88
21	5.38	6.89	6.77	7.87
22	5.52	5.99	8.26	8.36
23	4.6	4.86	7.64	8.71
24	5.2	5.93	8.08	7.71
25	5.27	6.05	6.84	7.18
26	4.75	6.12	9.37	8.06
27	4.63	5.59	7.23	7.32
28	4.62	5.31	7.35	7.59
29	4.79	5.32	7.5	7.45
30	4.79	5.5	8.17	9.33
Average	5.01±0.34b	5.89±0.55a	7.65±0.6a	7.93±0.53a

## Sheet: The length of internode
	‘Yangjiaocui-QX’-0ppm	‘Yangjiaocui-QX’-200ppm	‘Lvbao’-0ppm	‘Lvbao’-200ppm
1	7.46	3.9	9.68	8.74
2	6.52	6.37	7.93	7.97
3	6.69	5.84	10.43	7.11
4	6.45	5.25	8.69	7.39
5	7.72	3.48	9.19	8.05
6	6.52	4.51	8.91	7.22
7	6.6	5.27	8.04	7.26
8	6.98	5.46	10.01	5.89
9	6.87	6.04	9.67	9.05
10	6.5	5.68	9.25	8.64
11	7.48	5.8	8.01	7.35
12	7.19	6.43	8.41	6.66
13	7.28	4.36	8.13	8.43
14	6.87	4.72	9.48	8.13
15	6.36	5.1	8.76	6.62
16	7.41	5.32	7.49	7.44
17	6.43	5.95	7.43	8.21
18	7.5	4.85	9.1	7.24
19	6.37	4.83	7.34	7.01
20	7.16	5.15	9.35	8.26
21	6.18	5.81	10.3	8.33
22	6.62	6.54	9.75	9.32
23	6.5	6.55	10.08	6.84
24	7.56	4.84	11.23	7.02
25	6.21	5.67	7.84	7.16
26	6.77	4.95	9.84	6.4
27	7.53	6.03	9.97	8.32
28	6.61	5.85	8.7	6.73
29	7.02	6.43	8.66	8.45
30	6.88	6.67	8.49	8.12
Average	6.88±0.45a	5.46±0.81b	9.01±1a	7.65±0.85b
