# Supplementary material for: Distinct metabolic profiling is correlated with bisexual flowers formation resulting from exogenous ethephon induction in melon (Cucumis melo L.)
Source: PeerJ. 2022 Mar 9;10:e13088. doi: 10.7717/peerj.13088 (PMC8917798; doi:10.7717/peerj.13088)
Supplement: Dataset S2 — The contents of abscisic acid (ABA), indole-3-acetic acid (IAA), GA3 and zeatin riboside (ZR) were examined on shoot apex of main stem at 0, 1, 3, 5 days after ethephon treatment and control. Three biological replicates were performed for each sample. The raw data for each sample was listed. [file peerj-10-13088-s005.xlsx]

## Sheet: Hormone
		CK					ET
	DAT(d）	Ⅰ	Ⅱ	Ⅲ	Average		Ⅰ	Ⅱ	Ⅲ	Average
ABA	0	39.6721	37.1378	34.6037	37.1378±2.5342a		39.6721	37.1378	34.6037	37.1378±2.5342a
	1	34.3243	38.3412	38.5967	37.0874±2.3964A		187.049	164.878	192.084	181.3369±14.4748B
	3	37.585	43.6901	37.6683	39.6478±3.5010A		68.4741	74.979	75.3116	72.9216±3.8552B
	5	38.4262	37.585	41.4297	39.147±2.0211a		53.5577	49.5652	52.0386	51.7205±2.0152b
ZR	0	5.70782	5.13895	5.69936	5.5154±0.3260a		5.70782	5.13895	5.69936	5.5154±0.3260a
	1	5.24879	5.71224	5.97957	5.6469±0.3698a		6.59745	5.84438	5.87117	6.1043±0.4273a
	3	6.55235	5.87117	5.77793	6.0671±0.4228a		6.55235	6.41886	7.19643	6.7225±0.4158a
	5	6.67332	6.65808	7.2129	6.8481±0.3160a		7.46462	6.73465	6.56735	6.9222±0.4771a
IAA	0	22.4657	22.0389	23.7588	22.754±0.8956a		22.4657	22.0389	23.7588	22.754±0.8956a
	1	23.0256	21.2708	22.4591	22.2518±0.8956a		27.3506	24.367	21.9561	24.5579±2.7023b
	3	22.561	23.4466	24.7564	23.588±1.1045A		42.5375	45.8386	41.2099	43.1953±2.3834B
	5	25.9036	22.4082	23.9837	24.0985±1.7505a		24.367	25.7865	21.4644	23.8726±2.2030a
GA3	0	4.68197	4.07555	4.56413	4.4405±0.3215a		4.68197	4.07555	4.56413	4.4405±0.3215a
	1	4.01856	4.52473	4.15158	4.2316±0.2624a		5.01237	4.67451	4.36957	4.6855±0.3215a
	3	4.56703	4.14194	4.02792	4.2456±0.2841a		4.45165	4.20993	4.90852	4.5234±0.3548a
	5	4.84049	4.93141	4.28901	4.6870±0.3476a		3.84482	4.63122	4.36957	4.2819±0.4005a
