# Supplementary material for: Distinct metabolic profiling is correlated with bisexual flowers formation resulting from exogenous ethephon induction in melon (Cucumis melo L.)
Source: PeerJ. 2022 Mar 9;10:e13088. doi: 10.7717/peerj.13088 (PMC8917798; doi:10.7717/peerj.13088)
Supplement: Table S1 [file peerj-10-13088-s001.xlsx]

## Sheet: CK-ET
Pathway	P-value	FDR	Impact	Hits Cpd
Phenylalanine, tyrosine and tryptophan biosynthesis	0.0019719	0.17155	0.09982	L-Tyrosine cpd:C00082; Shikimic acid cpd:C00493; L-Tryptophan cpd:C00078; L-Phenylalanine cpd:C00079
Phenylalanine metabolism	0.018131	0.66459	0.5	L-Phenylalanine cpd:C00079; 4-Hydroxycinnamic acid cpd:C00811
Flavone and flavonol biosynthesis	0.022917	0.66459	0.36	Kaempferol cpd:C05903; Luteolin cpd:C01514
Nitrogen metabolism	0.060366	1	0	L-Phenylalanine cpd:C00079; L-Glutamine cpd:C00064
Aminoacyl-tRNA biosynthesis	0.10408	1	0	L-Phenylalanine cpd:C00079; L-Glutamine cpd:C00064; L-Tryptophan cpd:C00078; L-Tyrosine cpd:C00082
Phenylpropanoid biosynthesis	0.11991	1	0.09397	4-Hydroxycinnamic acid cpd:C00811; Coniferyl aldehyde cpd:C02666; L-Phenylalanine cpd:C00079
Ubiquinone and other terpenoid-quinone biosynthesis	0.12719	1	0	L-Tyrosine cpd:C00082; 4-Hydroxycinnamic acid cpd:C00811
Isoquinoline alkaloid biosynthesis	0.15264	1	0.5	L-Tyrosine cpd:C00082
Galactose metabolism	0.15546	1	0.12153	Stachyose cpd:C01613; Alpha-Lactose cpd:C00243
Indole alkaloid biosynthesis	0.17577	1	0	L-Tryptophan cpd:C00078
Anthocyanin biosynthesis	0.19829	1	0	Chrysanthemin cpd:C08604
Tropane, piperidine and pyridine alkaloid biosynthesis	0.19829	1	0	L-Phenylalanine cpd:C00079
beta-Alanine metabolism	0.28254	1	0	Pantothenic acid cpd:C00864
Pantothenate and CoA biosynthesis	0.32138	1	0.15	Pantothenic acid cpd:C00864
Flavonoid biosynthesis	0.32764	1	0.00429	Kaempferol cpd:C05903; Luteolin cpd:C01514
Histidine metabolism	0.35816	1	0	Imidazoleacetic acid cpd:C02835
Glyoxylate and dicarboxylate metabolism	0.37582	1	0.10544	Citric acid cpd:C00158
Tyrosine metabolism	0.39301	1	0.27273	L-Tyrosine cpd:C00082
Citrate cycle (TCA cycle)	0.42602	1	0.0952	Citric acid cpd:C00158
Glucosinolate biosynthesis	0.43661	1	0	L-Phenylalanine cpd:C00079; L-Tryptophan cpd:C00078
Alanine, aspartate and glutamate metabolism	0.45728	1	0.24138	L-Glutamine cpd:C00064
alpha-Linolenic acid metabolism	0.47229	1	0.15	9(S)-HPOT cpd:C16321
Glycolysis or Gluconeogenesis	0.5011	1	0.00037	Beta-D-Glucose cpd:C00221
Glutathione metabolism	0.51492	1	0.41644	Glutathione cpd:C00051
Tryptophan metabolism	0.52837	1	0.17059	L-Tryptophan cpd:C00078
Glycine, serine and threonine metabolism	0.56659	1	0	L-Tryptophan cpd:C00078
Starch and sucrose metabolism	0.56659	1	0	Beta-D-Glucose cpd:C00221
Pyrimidine metabolism	0.65439	1	0	L-Glutamine cpd:C00064
Arginine and proline metabolism	0.65439	1	0	L-Glutamine cpd:C00064
Purine metabolism	0.82121	1	0	L-Glutamine cpd:C00064
