# Supplementary material for: Distinct metabolic profiling is correlated with bisexual flowers formation resulting from exogenous ethephon induction in melon (Cucumis melo L.)
Source: PeerJ. 2022 Mar 9;10:e13088. doi: 10.7717/peerj.13088 (PMC8917798; doi:10.7717/peerj.13088)
Supplement: Table S2 [file peerj-10-13088-s002.xlsx]

## Sheet: 139 different metabolites
Class	Compound name	Formula	CK1	CK2	CK3	Mean CK	ET1	ET2	ET3	Mean ET	VIP	P-value	Q-value	FoldChange	log2FoldChange
Amino acids or mini peptide	Glu Phe	C14H18N2O5	0.00198018	0.00205294	0.00205473	0.00202928	0.00288317	0.00253749	0.0026226	0.00268109	1.51276	0.00365299	0.0212786	1.3212	0.401847
	gamma-Glutamylleucine	C11H20N2O5	3.54897e-05	4.10577e-05	3.28352e-05	3.64609e-05	4.73622e-05	4.71605e-05	4.66858e-05	4.70695e-05	1.40131	0.0475287	0.0752538	1.29096	0.368444
	Phe Glu	C14H18N2O5	0.00211457	0.00219763	0.00211708	0.00214309	0.00294037	0.00258025	0.00257086	0.00269716	1.45956	0.0112927	0.0361909	1.25853	0.331745
	Lys Met Met	C16H32N4O4S2	6.49476e-05	6.43528e-05	6.61493e-05	6.51499e-05	8.55484e-05	7.67404e-05	7.81782e-05	8.01557e-05	1.49316	0.00569196	0.0251845	1.23033	0.299042
	L-Tryptophan		0.000137689	0.00013984	0.000138194	0.000138574	0.000145455	0.000147734	0.000141868	0.000145019	1.36837	0.0242733	0.0537372	1.04651	0.0655837
	L-Phenylalanine	C9H11NO2	0.0329562	0.0325444	0.0327795	0.0327601	0.0340721	0.0334397	0.0332917	0.0336012	1.32918	0.0346526	0.0636789	1.02567	0.0365736
	Glutathione	C10H17N3O6S	4.38674e-06	2.99023e-06	5.05278e-06	4.14325e-06	2.21986e-06	1.57708e-06	1.73885e-06	1.84526e-06	1.42118	0.0226801	0.0520846	0.445366	-1.16694
	Arg Val Glu	C16H30N6O6	2.09778e-05	2.07428e-05	2.20563e-05	2.1259e-05	7.66244e-06	1.44159e-05	1.05012e-05	1.08598e-05	1.39758	0.00650773	0.0264637	0.510835	-0.96907
	p-Coumaric acid		0.000193949	0.000149354	0.000170373	0.000171225	8.61115e-05	9.92627e-05	9.67199e-05	9.40313e-05	1.51149	0.00462263	0.023404	0.549168	-0.864682
	13-Octadecene-9,11-diynoic acid, (Z)-	C18H26O2	6.72584e-06	7.67131e-06	5.18939e-06	6.52884e-06	3.79179e-06	2.62958e-06	4.89601e-06	3.77246e-06	1.25346	0.0475265	0.075252	0.577814	-0.791322
	Asn Tyr	C13H17N3O5	2.17352e-05	1.96398e-05	1.89192e-05	2.00981e-05	1.24694e-05	1.02816e-05	1.27078e-05	1.18196e-05	1.50684	0.00193693	0.0175622	0.588096	-0.765876
	Arg Val Leu	C17H34N6O4	9.8561e-06	1.46122e-05	1.43394e-05	1.29359e-05	7.54727e-06	7.12524e-06	9.15006e-06	7.94086e-06	1.32744	0.0396357	0.0684573	0.613862	-0.704014
	Phe Gln Ala Arg	C23H36N8O6	5.51631e-05	4.84992e-05	4.87034e-05	5.07886e-05	2.92333e-05	3.02131e-05	3.49595e-05	3.14686e-05	1.51146	0.00235455	0.0181237	0.6196	-0.69059
	15-methyl-15(S)-PGE1	C21H36O5	1.51197e-05	1.13112e-05	1.29074e-05	1.31127e-05	7.5546e-06	8.50697e-06	8.36437e-06	8.14198e-06	1.46833	0.0121797	0.0376155	0.620921	-0.687518
	Gln Leu	C11H21N3O4	0.000445755	0.000475507	0.000457232	0.000459498	0.000266266	0.00027154	0.0003308	0.000289535	1.50066	0.0016262	0.0169949	0.630112	-0.666321
	ALANYL-dl-LEUCINE	C9H18N2O3	8.72813e-05	9.10693e-05	8.5497e-05	8.79492e-05	5.36425e-05	5.99447e-05	5.50704e-05	5.62192e-05	1.5518	0.000228181	0.0126717	0.639223	-0.645608
	Ile Ile Ile	C18H35N3O4	0.000634362	0.000630485	0.000659071	0.000641306	0.000392229	0.000428462	0.000437474	0.000419388	1.54974	0.000175623	0.0126717	0.65396	-0.612727
	Ile Ala Ser	C12H23N3O5	0.000383158	0.000448506	0.000439291	0.000423652	0.00023837	0.000293779	0.000304466	0.000278872	1.44202	0.00746162	0.0286082	0.658257	-0.603276
	gamma-Glutamyltyrosine	C14H18N2O6	8.64833e-05	9.89613e-05	9.45599e-05	9.33348e-05	5.70955e-05	6.05806e-05	7.00494e-05	6.25752e-05	1.47627	0.00445243	0.0230721	0.670438	-0.576825
	Ile Gly Leu Pro	C19H34N4O5	9.74274e-05	8.72419e-05	9.03756e-05	9.16816e-05	4.59359e-05	6.95444e-05	7.05044e-05	6.19949e-05	1.28726	0.0258207	0.0552322	0.676198	-0.564483
	Leucyl-leucine	C12H24N2O3	0.000394095	0.000400646	0.000324748	0.000373163	0.00024949	0.000271778	0.00023616	0.000252476	1.46241	0.0102633	0.034397	0.676583	-0.563661
	Ser Leu Tyr	C18H27N3O6	8.60833e-05	8.41229e-05	8.00901e-05	8.34321e-05	5.04463e-05	5.59236e-05	6.39188e-05	5.67629e-05	1.47579	0.00341151	0.0207388	0.680348	-0.555655
	Thr Val Tyr	C18H27N3O6	5.9775e-05	5.79446e-05	5.82655e-05	5.86617e-05	3.87694e-05	3.77507e-05	4.42308e-05	4.02503e-05	1.51919	0.000915365	0.014697	0.686143	-0.543419
	Ile Ile Leu	C18H35N3O4	0.000628609	0.000674246	0.000666608	0.000656488	0.000427187	0.000463785	0.000466057	0.000452343	1.54375	0.000418043	0.0126717	0.689035	-0.537351
	Val Ala	C8H16N2O3	0.000245225	0.000215927	0.000219653	0.000226935	0.000155664	0.000156928	0.000161009	0.000157867	1.53538	0.00178927	0.0173126	0.695649	-0.523569
	Trp Ala Gly	C16H20N4O4	0.000109602	9.945e-05	0.000112453	0.000107168	7.13558e-05	7.37421e-05	7.98016e-05	7.49665e-05	1.51289	0.00233514	0.0181014	0.699521	-0.515562
	Tyrosine	C9H11NO3	3.08766e-05	3.18025e-05	3.16828e-05	3.1454e-05	2.01367e-05	2.21546e-05	2.49711e-05	2.24208e-05	1.47428	0.00322694	0.0202933	0.712812	-0.488406
	Thr Trp Glu	C20H26N4O7	0.000111857	0.000103408	0.000116561	0.000110609	7.73564e-05	7.7173e-05	8.47821e-05	7.97705e-05	1.50943	0.00255992	0.0183909	0.721196	-0.471538
	Trp Leu	C17H23N3O3	0.000345936	0.000349852	0.000316828	0.000337538	0.00023363	0.000241684	0.000258039	0.000244451	1.52121	0.00181795	0.0173637	0.724217	-0.465506
	Ala Gln Ile	C14H26N4O5	7.9388e-05	7.85544e-05	7.08503e-05	7.62642e-05	4.70685e-05	5.4603e-05	6.47355e-05	5.5469e-05	1.34449	0.0229947	0.0524206	0.727327	-0.459324
	Asn Met	C9H17N3O4S1	4.08282e-05	4.43079e-05	4.14957e-05	4.22106e-05	2.84011e-05	3.26364e-05	3.12177e-05	3.07517e-05	1.50636	0.0022016	0.0179389	0.728531	-0.456938
	L-Glutamine	C5H10N2O3	1.36665e-05	1.47726e-05	1.46335e-05	1.43575e-05	1.01997e-05	1.07263e-05	1.0764e-05	1.05633e-05	1.54175	0.000641647	0.0131316	0.735734	-0.442743
	Trp Val	C16H21N3O3	0.000275224	0.000266071	0.00025766	0.000266318	0.000188259	0.000191614	0.000213214	0.000197696	1.51065	0.00181295	0.0173548	0.742329	-0.42987
	Leu Thr Ala	C13H25N3O5	5.38467e-05	5.22882e-05	4.67269e-05	5.09539e-05	3.9201e-05	3.49236e-05	4.00302e-05	3.80516e-05	1.45327	0.00853837	0.0309921	0.746785	-0.421236
	Val Lys Glu	C16H30N4O6	6.3758e-05	6.08033e-05	6.39264e-05	6.28293e-05	5.58536e-05	3.76931e-05	4.86474e-05	4.7398e-05	1.229	0.0454525	0.0735488	0.754394	-0.40661
	Ser Ala Leu	C12H23N3O5	0.000123303	0.000128675	0.000121113	0.000124364	9.40132e-05	9.73406e-05	9.04799e-05	9.39445e-05	1.54476	0.000529153	0.0126717	0.755402	-0.404684
	Ser Leu Leu	C15H29N3O5	0.000140183	0.000148303	0.000134566	0.000141017	9.99423e-05	0.00010496	0.000115369	0.000106757	1.47805	0.00477931	0.0236964	0.757052	-0.401536
	Asp Phe Glu	C18H23N3O8	2.80675e-05	2.4633e-05	2.85625e-05	2.70877e-05	1.68153e-05	2.12429e-05	2.34908e-05	2.05163e-05	1.24683	0.0470992	0.0749071	0.757404	-0.400864
	Glu Ile Asp	C15H25N3O8	6.36032e-05	6.64212e-05	6.08996e-05	6.36413e-05	4.42651e-05	4.95739e-05	5.24981e-05	4.8779e-05	1.45156	0.00677213	0.0270289	0.766468	-0.383702
	Asn Phe Thr	C17H24N4O6	0.000126885	0.00013302	0.000135601	0.000131835	9.92379e-05	0.000104005	0.000100204	0.000101149	1.5457	0.00049262	0.0126717	0.767236	-0.382258
	Lys Ile	C12H25N3O3	0.00149243	0.00136107	0.00157622	0.00147657	0.00119867	0.00105433	0.00116848	0.00114049	1.43	0.0117539	0.0369448	0.772392	-0.372595
	Ala Ile Ile	C15H29N3O4	0.000132891	0.000132415	0.000133283	0.000132863	9.81082e-05	0.000101092	0.00011165	0.000103617	1.49916	0.0188519	0.0475595	0.779874	-0.358688
	Thr Ala Leu	C13H25N3O5	0.000118377	0.000136572	0.000132589	0.000129179	8.91963e-05	0.00010348	0.000109643	0.000100773	1.34397	0.0256751	0.0550958	0.780102	-0.358266
	Ala Ile Asp	C13H23N3O6	0.00108087	0.00102174	0.00101289	0.0010385	0.000804276	0.000822896	0.000803521	0.000810231	1.55147	0.000509683	0.0126717	0.780192	-0.358098
	Asp Leu Glu Asp	C19H30N4O11	1.01972e-05	1.03332e-05	9.12294e-06	9.88446e-06	6.47272e-06	7.89915e-06	8.79051e-06	7.72079e-06	1.24602	0.0493981	0.0767274	0.781104	-0.356413
	Thr Val Phe	C18H27N3O5	0.000133617	0.000148974	0.000142523	0.000141705	0.000109914	0.000111728	0.000112107	0.00011125	1.51745	0.0188126	0.0475084	0.78508	-0.349089
	Phe Ala Val	C17H25N3O4	0.000154356	0.000138552	0.000136471	0.000143126	0.000102739	0.000107077	0.000127899	0.000112572	1.32631	0.0334627	0.062446	0.78652	-0.346444
	Ile Glu	C11H20N2O5	0.00073074	0.000724971	0.000660612	0.000705441	0.000600787	0.000552786	0.000515455	0.000556343	1.43232	0.0111187	0.0358988	0.788645	-0.342552
	Phe Glu Glu	C19H25N3O8	8.94794e-05	0.000100285	8.87451e-05	9.28365e-05	6.77326e-05	7.91498e-05	7.43692e-05	7.37505e-05	1.39723	0.0186677	0.0473191	0.794413	-0.33204
	Ser Val Glu	C13H23N3O7	0.000399944	0.000408377	0.000448297	0.000418873	0.000337078	0.000330753	0.000336384	0.000334738	1.4939	0.0281827	0.0573292	0.799141	-0.323479
	L-Tyrosine		0.0135423	0.0123064	0.0130122	0.0129536	0.00947494	0.0109787	0.0108066	0.0104201	1.41141	0.0130681	0.0389422	0.804414	-0.313989
	Ile Ile Asn	C16H30N4O5	0.000110723	0.000114438	0.000118346	0.000114503	8.948e-05	9.78159e-05	8.92148e-05	9.21702e-05	1.49416	0.00336598	0.0206317	0.804962	-0.313007
	Ser Val Met	C13H25N3O5S1	0.000159007	0.000153785	0.000162345	0.000158379	0.000134338	0.000125714	0.000124417	0.000128156	1.51686	0.00162433	0.016991	0.809175	-0.305476
	Ile Met Glu	C16H29N3O6S1	3.02807e-05	3.23232e-05	3.37747e-05	3.21262e-05	2.68752e-05	2.56105e-05	2.58799e-05	2.61219e-05	1.48489	0.0051933	0.0244136	0.813102	-0.298492
	Ala Val Leu	C14H27N3O4	0.000320414	0.000324593	0.000313405	0.000319471	0.000248301	0.000248819	0.00028275	0.000259956	1.44539	0.00738595	0.028441	0.81371	-0.297414
	13-HPODE	C18H32O4	0.000237973	0.000241325	0.000216023	0.000231774	0.00017885	0.000195119	0.000193961	0.00018931	1.442	0.011111	0.0358858	0.816788	-0.291967
	Ile Ala Phe	C18H27N3O4	8.48223e-05	8.08392e-05	8.35741e-05	8.30786e-05	6.03998e-05	7.0389e-05	7.29119e-05	6.79002e-05	1.36053	0.0191501	0.0479437	0.817302	-0.291059
	Leu Val Phe	C20H31N3O4	4.32905e-05	4.35592e-05	4.4968e-05	4.39393e-05	3.72884e-05	3.23829e-05	3.86632e-05	3.61115e-05	1.36813	0.0166518	0.044531	0.821851	-0.283051
	Asn Ile Leu	C16H30N4O5	0.000197965	0.000198089	0.000204167	0.000200074	0.000162587	0.000165561	0.000165265	0.000164471	1.56052	9.40216e-05	0.0126717	0.822051	-0.2827
	Val Val Asp	C14H25N3O6	0.000319451	0.000320837	0.000338135	0.000326141	0.000266912	0.000266349	0.000273418	0.000268893	1.53658	0.000876389	0.0144975	0.824468	-0.278465
	Glu Glu Ile	C16H27N3O8	9.81562e-05	9.95474e-05	9.89025e-05	9.88687e-05	7.82366e-05	8.80426e-05	8.16868e-05	8.26553e-05	1.47006	0.0279981	0.0571727	0.836011	-0.258406
	(±)13-HpODE	C18H32O4	0.000254162	0.000260478	0.000263726	0.000259456	0.000211809	0.000231229	0.0002171	0.000220046	1.48889	0.00361282	0.021192	0.848106	-0.237684
	Ile Gly Pro	C13H23N3O4	5.19999e-05	5.17447e-05	4.61329e-05	4.99592e-05	4.14075e-05	4.25746e-05	4.38019e-05	4.25947e-05	1.39114	0.0223971	0.0517781	0.85259	-0.230077
	Asp Ile Phe	C19H27N3O6	0.000143943	0.000148648	0.00013522	0.000142604	0.000121603	0.000134896	0.000123827	0.000126776	1.28434	0.0497228	0.0769777	0.889005	-0.169736
	Ser Ile Phe	C18H27N3O5	0.000348837	0.000364132	0.000342549	0.000351839	0.000299321	0.000335704	0.000304668	0.000313231	1.30458	0.0414065	0.07002	0.890267	-0.16769
	Asp Ile Asp	C14H23N3O8	0.000118905	0.000116401	0.000115208	0.000116838	0.000104744	9.74428e-05	0.000111272	0.000104486	1.28577	0.0406055	0.0693213	0.894285	-0.161194
	Gly Ile Phe	C17H25N3O4	0.00174459	0.00165212	0.00168124	0.00169265	0.00148205	0.00159991	0.0015581	0.00154669	1.34753	0.0294374	0.0583616	0.913768	-0.130099
	Gly Leu Leu	C14H27N3O4	0.00029472	0.000292625	0.000284768	0.000290704	0.000282049	0.000282334	0.000274805	0.000279729	1.28912	0.0482713	0.075846	0.962246	-0.0555221
Carbohydrates	Maltotriose	C18H32O16	0.00134833	0.0013168	0.00103953	0.00123489	0.00528031	0.00358254	0.00365831	0.00417372	1.52474	0.00640123	0.0263068	3.37983	1.75695
	Lactose		8.17675e-07	1.84469e-06	6.29323e-07	3.32479e-06	5.67959e-07	6.7942e-07	1.07609e-06	6.04053e-06	1.53188	0.00185623	0.0174298	1.81682	0.861413
	Stachyose tetrahydrate		8.68041e-07	7.43816e-07	7.33627e-07	7.81828e-07	1.43933e-06	1.15186e-06	1.20989e-06	1.26703e-06	1.47857	0.00770671	0.0291401	1.62059	0.696522
	beta-D-Glucopyranoside, 2-methoxy-4-[(1S,2S,3S)-1,2,3,4-tetrahydro-3,7-dihydroxy-2,3-bis(hydroxymethyl)-6-methoxy-1-naphthalenyl]phenyl	C26H34O12	6.94898e-05	8.76005e-05	7.38884e-05	7.69929e-05	0.00010989	0.00011511	9.58779e-05	0.000106959	1.38559	0.019368	0.0482209	1.38921	0.474264
	D-Galactose	C6H12O6	5.59467e-05	6.1497e-05	5.9208e-05	5.88839e-05	8.79884e-05	7.63651e-05	7.95118e-05	8.12884e-05	1.50338	0.00424508	0.0226461	1.38049	0.465176
	Kaempherol 3-O-beta-sophoroside	C22H22O11	0.00153371	0.00157675	0.00143542	0.00151529	0.00185391	0.0018504	0.00170611	0.00180347	1.43008	0.0109089	0.0355408	1.19018	0.25118
	Beta-D-Glucose	C6H12O6	0.000429678	0.000376113	0.000409645	0.000405145	0.000487101	0.000485687	0.000469642	0.00048081	1.41979	0.0103501	0.0345545	1.18676	0.247028
	(2S,3S,9R,13R,14S,16R)-2,16-dihydroxy-17-[(2R)-2-hydroxy-6-methyl-3-oxohept-6-en-2-yl]-4,4,9,13,14-pentamethyl-3-[(2R,3R,4S,5S,6R)-3,4,5-trihydroxy-6-(hydroxymethyl)oxan-2-yl]oxy-1,2,3,7,8,10,12,15,16,17-decahydrocyclopenta[a]phenanthren-11-one	C36H56O11	1.2022e-05	9.07165e-06	1.21565e-05	1.10834e-05	5.53894e-06	5.21653e-06	7.14799e-06	5.96782e-06	1.43749	0.0119652	0.0372805	0.538448	-0.893122
	beta-D-Glucopyranose, 1-O-[(2E)-3-(2-hydroxyphenyl)-1-oxo-2-propen-1-yl]-	C15H18O8	0.000112366	9.91651e-05	8.52249e-05	9.89188e-05	6.62106e-05	4.14481e-05	6.94354e-05	5.90313e-05	1.29644	0.0278786	0.0570708	0.596766	-0.744763
	11-deoxy PGF2α	C20H34O4	2.58465e-05	3.1533e-05	2.34511e-05	2.69435e-05	1.93278e-05	1.6332e-05	1.36625e-05	1.64408e-05	1.38905	0.0223735	0.0517523	0.610194	-0.712661
	4-Chlorophenol	C6H5ClO	0.00477443	0.00512025	0.00416786	0.00468751	0.00337094	0.00287404	0.00383089	0.00335862	1.34064	0.0275704	0.0568056	0.716504	-0.480953
	7-hydroxy-2-(4-hydroxyphenyl)-5-[(2S,3R,4S,5S,6R)-3,4,5-trihydroxy-6-(hydroxymethyl)oxan-2-yl]oxy-2,3-dihydrochromen-4-one	C21H22O10	2.85132e-05	2.67461e-05	3.06045e-05	2.86213e-05	2.24945e-05	2.22996e-05	1.78353e-05	2.08765e-05	1.38872	0.0147882	0.0416662	0.729406	-0.455207
Organic acids	9,12,15-Octadecatrienoic acid, 3-(hexopyranosyloxy)-2-hydroxypropyl ester, (9Z,12Z,15Z)-	C27H46O9	0.00193967	0.00177563	0.00232067	0.00201199	0.00336993	0.00311018	0.00334465	0.00327492	1.49431	0.0022365	0.0179829	1.6277	0.702837
	9(S)-HpOTrE	C18H30O4	0.00353884	0.00370864	0.00370085	0.00364944	0.00415512	0.00402874	0.00382096	0.00400161	1.33242	0.0347364	0.0637643	1.0965	0.132904
	Shikimic acid		0.000252135	0.000248268	0.000321894	0.000274099	0.000449351	0.000459905	0.00050267	0.000470642	1.49643	0.00245776	0.0182626	1.71705	0.779933
	8-Hydroxy-4,8-dimethyl-4E,9-decadienoic acid	C12H20O3	8.87724e-05	8.86153e-05	9.97453e-05	9.23777e-05	0.000131224	0.000139087	0.00011966	0.00012999	1.48713	0.00505035	0.0241745	1.40716	0.492786
	2-(1,2-dihydroxyethyl)-3-[(E)-3-(3,4-dihydroxyphenyl)prop-2-enoyl]oxy-4-hydroxy-3,4-dihydro-2H-pyran-6-carboxylic acid	C17H18O10	0.0116909	0.0139282	0.0133215	0.0129802	0.0158597	0.0178142	0.0164545	0.0167095	1.41158	0.013474	0.0395178	1.2873	0.364353
	9,10-Epoxyoctadecenoic acid	C18H32O3	2.97568e-07	1.49194e-07	1.56044e-07	2.00935e-07	2.57168e-08	5.10848e-08	2.50452e-08	3.39489e-08	1.4838	0.0272718	0.0565454	0.168954	-2.56529
	(E)-7-(4-methoxy-5-methyl-6-oxopyran-2-yl)-5-methyloct-6-enoic acid	C16H22O5	3.34418e-05	3.88999e-05	3.57394e-05	3.6027e-05	2.57168e-08	2.55424e-08	2.26332e-05	7.56149e-06	1.15963	0.0208949	0.0500798	0.209884	-2.25234
	(9S,10E,12Z,15Z)-9-Hydroxy-10,12,15-octadecatrienoic acid	C18H30O3	0.000463294	0.000529063	0.000474788	0.000489048	0.000379087	0.000330576	0.000363365	0.000357676	1.47351	0.00610677	0.0258554	0.731372	-0.451323
	Citric acid	C6H8O7	0.00197539	0.00223133	0.00190851	0.00203841	0.00165799	0.00122311	0.00158873	0.00148994	1.30601	0.0303596	0.0590876	0.730933	-0.452188
Flavonoids	Orientin 2''-rhamnoside	C27H30O15	2.99362e-05	2.9858e-05	2.63193e-05	2.87045e-05	3.93627e-05	3.21605e-05	3.83262e-05	3.66165e-05	1.32979	0.0359058	0.0649373	1.27564	0.351217
	Apigenin 7-cellobioside-4'-glucoside	C33H40O20	0.000224928	0.000256817	0.000231815	0.000237853	0.000276918	0.000292517	0.000304735	0.00029139	1.42015	0.0131549	0.0390668	1.22508	0.292879
	Kaempferol	C15H10O6	7.10128e-05	7.82337e-05	7.11371e-05	7.34612e-05	8.10317e-05	8.8966e-05	9.37129e-05	8.79035e-05	1.35171	0.0304788	0.0591795	1.1966	0.258938
	Cyanidin 3-glucoside	C21H20O11	0.00715702	0.00805902	0.00727418	0.00749674	0.00826015	0.00870525	0.00930335	0.00875625	1.31977	0.0383588	0.0672885	1.16801	0.224049
	Luteolin	C15H10O6	0.000320217	0.000315408	0.00030516	0.000313595	0.000176164	0.000253987	0.000263048	0.000231067	1.22759	0.0417713	0.0703338	0.736832	-0.440593
	5,7-dihydroxy-2-(4-hydroxyphenyl)-3,4-dihydro-2H-1-benzopyran-4-one	C15H12O5	0.000320161	0.000288578	0.000268795	0.000292511	0.000205833	0.000200329	0.000262357	0.00022284	1.27643	0.0485328	0.0760524	0.761816	-0.392486
Lignans	(-)-Wikstromol	C20H22O7	0.000605847	0.000586102	0.000584124	0.000592024	0.000734171	0.000740948	0.000704512	0.000726544	1.5425	0.000516663	0.0126717	1.22722	0.295393
	m-Coumaric acid	C9H8O3	4.39632e-05	3.36215e-05	3.61565e-05	3.79137e-05	1.89521e-05	1.63173e-05	1.67009e-05	1.73234e-05	1.53142	0.00306606	0.0198792	0.456916	-1.13
	4-Hydroxycinnamic acid	C9H8O3	3.87535e-05	3.29592e-05	3.53317e-05	3.56815e-05	1.51237e-05	1.93511e-05	1.85898e-05	1.76882e-05	1.52598	0.0010685	0.0153787	0.495725	-1.01239
	Caffeic acid	C9H8O4	2.1149e-05	1.96062e-05	1.76538e-05	1.94697e-05	1.03527e-05	1.42168e-05	1.54581e-05	1.33425e-05	1.30234	0.0291107	0.0580979	0.685299	-0.545195
	cis-p-Coumaric acid	C9H8O3	0.00318577	0.00294214	0.00308416	0.00307069	0.00222042	0.00255768	0.00255764	0.00244525	1.43194	0.00923487	0.0324328	0.796318	-0.328583
	2-Hydroxycinnamic acid	C9H8O3	0.0026513	0.00248054	0.00266696	0.0025996	0.00183742	0.00221081	0.00231695	0.00212173	1.27748	0.038403	0.0673296	0.816174	-0.293051
Terpenoids	(-)-3-Isothujone	C10H16O	1.91067e-05	1.29455e-05	1.51355e-05	1.57292e-05	2.23689e-05	2.04892e-05	2.53969e-05	2.27516e-05	1.29727	0.0379653	0.0669209	1.44645	0.532521
	4-ACETOXYPHENOL	C8H8O3	5.13791e-06	3.86742e-06	4.23191e-06	4.41242e-06	5.97607e-06	5.19277e-06	6.43631e-06	5.86838e-06	1.27141	0.0498521	0.0770769	1.32997	0.411394
	5-Methylmaleylacetate	C7H8O5	0.000476526	0.000470088	0.00042459	0.000457068	0.000557314	0.000605142	0.000611293	0.00059125	1.475	0.00474418	0.0236319	1.29357	0.371359
	(S)-Phellandral	C10H16O	1.96705e-06	3.35154e-06	1.86127e-06	2.39329e-06	2.57168e-08	2.55424e-08	2.50452e-08	2.54348e-08	1.56732	0.0387374	0.0676389	0.0106276	-6.55605
	8-[4,5-dihydroxy-6-(hydroxymethyl)-3-(3,4,5-trihydroxy-6-methyloxan-2-yl)oxyoxan-2-yl]-7-hydroxy-2-(4-hydroxyphenyl)-5-[3,4,5-trihydroxy-6-(hydroxymethyl)oxan-2-yl]oxychromen-4-one	C33H40O19	0.0332128	0.0332243	0.0325823	0.0330065	0.0281894	0.0281997	0.0291183	0.0285025	1.55013	0.000272325	0.0126717	0.863542	-0.211661
Esters	Stearidonic Acid methyl ester	C19H30O2	0.000443057	0.000303258	0.000553594	0.000433303	0.000901727	0.000670484	0.000721085	0.000764432	1.31102	0.0304099	0.0591264	1.7642	0.819012
	Dimethyl phthalate	C10H10O4	4.34866e-07	3.8686e-07	4.46406e-07	4.22711e-07	2.71722e-07	2.55424e-08	2.50452e-08	1.07436e-07	1.23627	0.0200001	0.0490077	0.254161	-1.97619
	Methyl 4-hydroxycinnamate		1.1592e-05	9.75147e-06	1.00932e-05	1.04789e-05	8.15239e-06	6.803e-06	8.46394e-06	7.80644e-06	1.36021	0.0246437	0.0541045	0.744969	-0.424748
	Prostaglandin D2 methyl ester	C21H34O5	0.000214356	0.000197039	0.000219459	0.000210285	0.000156776	0.000146346	0.000189855	0.000164325	1.30066	0.0357838	0.0648165	0.781442	-0.355789
	Alantolactone	C15H20O2	0.0028934	0.0031102	0.00271378	0.0029058	0.00233485	0.00262523	0.0023995	0.0024532	1.33824	0.0351141	0.064147	0.844242	-0.244272
Aromatics	4-Hydroxystyrene	C8H8O	1.59864e-05	1.52019e-05	1.73455e-05	1.6178e-05	1.99294e-05	2.33842e-05	2.71706e-05	2.34947e-05	1.39148	0.0285166	0.0576092	1.45227	0.538309
	Vanillic acid	C8H8O4	1.59864e-05	1.52019e-05	1.73455e-05	0.0001689	1.99294e-05	2.33842e-05	2.71706e-05	0.000227816	1.50978	0.0159201	0.0434417	1.34883	0.431704
	Butyl salicylate	C11H14O3	0.00160044	0.00159852	0.00159309	0.00159735	0.00169367	0.00168811	0.00165991	0.00168056	1.52288	0.00146447	0.0166252	1.0521	0.0732663
Plant hormones	Salicylic acid	C7H6O3	0.000383213	0.000368566	0.000316127	0.000355968	0.000428101	0.000464673	0.00043842	0.000443731	1.35894	0.0190937	0.0478715	1.24655	0.317937
	Methyl jasmonate	C13H20O3	0.000167987	0.000150731	0.000152615	0.000157111	0.000188168	0.000177441	0.0001741	0.000179903	1.33826	0.0301006	0.0588864	1.14507	0.195436
	(±)7-epi Jasmonic Acid	C12H18O3	0.00019088	0.000200746	0.000190403	0.00019401	0.000176307	0.000171768	0.000160272	0.000169449	1.4145	0.0136541	0.0397673	0.873404	-0.195279
Alkaloids	Tuberostemonine		2.96249e-05	3.60839e-05	2.43431e-05	3.00173e-05	4.63403e-05	4.01957e-05	3.89369e-05	4.18243e-05	1.26367	0.0448155	0.0730105	1.39334	0.478548
	Imidazoleacetic acid	C5H6N2O2	6.6355e-05	7.3726e-05	6.89394e-05	6.96734e-05	9.59534e-05	9.00122e-05	8.49963e-05	9.03206e-05	1.48024	0.00574232	0.0252573	1.29634	0.374447
	Urocanic acid	C6H6N2O2	1.07507e-05	9.76439e-06	8.19771e-06	9.57093e-06	7.52089e-06	5.75047e-06	6.00979e-06	6.42705e-06	1.36596	0.0273879	0.0566469	0.671518	-0.574502
Phenols	1H-Indole-3-propanoic acid, alpha-hydroxy-beta-methyl-	C12H13NO3	2.928e-05	3.28318e-05	3.04303e-05	3.08474e-05	4.05491e-05	4.00051e-05	3.69171e-05	3.91571e-05	1.47293	0.00571718	0.0252211	1.26938	0.344127
	5-Acetylsalicylic acid		2.71688e-05	2.29184e-05	2.17138e-05	2.39337e-05	1.28762e-05	1.29822e-05	1.74354e-05	1.44312e-05	1.42331	0.0131382	0.0390428	0.602969	-0.729845
	Chavicol	C9H10O	4.24909e-05	4.37878e-05	4.08501e-05	4.23763e-05	3.28547e-05	2.90611e-05	2.78101e-05	2.99086e-05	1.50434	0.0020022	0.0176627	0.705787	-0.502695
Nucleosides	3-Hydroxy-1-(3-hydroxy-4-methoxyphenyl)-2-{4-[(1E)-3-hydroxy-1-propen-1-yl]-2-methoxyphenoxy}propyl beta-D-glucopyranoside	C26H34O12	3.73463e-05	4.19115e-05	3.6065e-05	3.8441e-05	4.88677e-05	4.43479e-05	5.06783e-05	4.79647e-05	1.38341	0.0211728	0.0504034	1.24775	0.319327
	3-Hydroxy-19-norpregna-1,3,5(10)-trien-20-one	C20H26O2	0.000236886	0.000175898	0.00017623	0.000196338	0.000111961	0.00012058	0.000129136	0.000120559	1.43961	0.0221463	0.051503	0.614038	-0.703599
Vitamins	Pantothenic Acid	C9H17NO5	0.00056609	0.000580561	0.000596618	0.00058109	0.000500657	0.000526133	0.000525235	0.000517342	1.46621	0.00629379	0.0261452	0.890296	-0.167644
	Calcium pantothenate		7.21362e-05	6.90274e-05	7.75827e-05	7.29154e-05	6.50674e-05	6.31982e-05	6.67304e-05	6.49987e-05	1.30726	0.0427409	0.0712057	0.891425	-0.165814
Others	(-)-trans-Isopiperitenol	C10H16O	4.42493e-06	2.88357e-06	3.55893e-06	3.62248e-06	7.76291e-06	8.68711e-06	6.22346e-06	7.55783e-06	1.44267	0.00963937	0.0332274	2.08637	1.06099
	(3R,3aR)-3-(3-Furyl)-3a,7-dimethyl-3a,4,5,6-tetrahydro-2-benzofuran-1(3H)-one	C14H16O3	8.52424e-06	1.19526e-05	8.8718e-06	9.78288e-06	1.61565e-05	1.63152e-05	1.68198e-05	1.64305e-05	1.45844	0.00387941	0.0218302	1.67952	0.748045
	PtdIns-(1,2-dihexanoyl)	C21H39O13P	7.61925e-07	6.36897e-07	8.28748e-07	7.42523e-07	9.91469e-07	1.06311e-06	9.14007e-07	9.89528e-07	1.34084	0.0251685	0.0546146	1.33266	0.414304
	(2E)-3,7-Dimethyl-2,6-octadien-1-yl 6-O-[(2R,3R,4R)-3,4-dihydroxy-4-(hydroxymethyl)tetrahydro-2-furanyl]-beta-D-glucopyranoside	C21H36O10	0.000212371	0.000233484	0.000242917	0.000229591	0.000291439	0.000339747	0.00026654	0.000299242	1.33409	0.0404183	0.0691561	1.30337	0.382247
	2-Butanone, 4-[3-(beta-D-glucopyranosyloxy)-4-hydroxy-2,6,6-trimethyl-1-cyclohexen-1-yl]-	C19H32O8	0.000140757	0.000130014	0.000114068	0.00012828	0.000184316	0.000156249	0.00015583	0.000165465	1.31509	0.0381497	0.0670936	1.28988	0.367234
	Curcumenol		0.00043098	0.000470648	0.0004143	0.000438643	0.000333887	0.000353286	0.000324642	0.000337272	1.48971	0.0056371	0.0251041	0.768898	-0.379135
	Ferulaldehyde		9.02588e-05	8.13632e-05	9.0548e-05	8.739e-05	5.41186e-05	6.42008e-05	7.32277e-05	6.3849e-05	1.35393	0.0200627	0.0490842	0.730622	-0.452803
	Zierin	C14H17NO7	0.00722613	0.00737942	0.00669889	0.00710148	0.00644138	0.00628599	0.00639245	0.00637327	1.37382	0.026082	0.0554748	0.897456	-0.156086
	NH-DVal(NMe)-Val-OMe	C12H24N2O3	0.00084096	0.000874321	0.000775243	0.000830175	0.000550499	0.000596491	0.000557472	0.000568154	1.53582	0.00127544	0.0161032	0.684379	-0.547133
	NCGC00380686-01	C20H26O6	0.000302419	0.000323659	0.000315985	0.000314021	0.00021192	0.000236302	0.000225202	0.000224475	1.53562	0.000676094	0.0132468	0.71484	-0.484308
	Polygonatiin	C33H40O20	6.61964e-05	7.31759e-05	7.12939e-05	7.0222e-05	4.70581e-05	5.32779e-05	5.31675e-05	5.11678e-05	1.4965	0.00287563	0.0193546	0.728658	-0.456686
	N2-Acetylphenelzine	C10H14N2O	7.99034e-05	8.04055e-05	8.57166e-05	8.20085e-05	7.61683e-05	7.64405e-05	7.50082e-05	7.58724e-05	1.34381	0.0325508	0.0614751	0.925177	-0.112199
