# Supplementary material for: Distinct metabolic profiling is correlated with bisexual flowers formation resulting from exogenous ethephon induction in melon (Cucumis melo L.)
Source: PeerJ. 2022 Mar 9;10:e13088. doi: 10.7717/peerj.13088 (PMC8917798; doi:10.7717/peerj.13088)
Supplement: Table S3 [file peerj-10-13088-s003.xlsx]

## Sheet: ET-CK
Class	Gene ID	ET1	ET2	ET3	CK1	CK2	CK3	Mean ET	Mean CK	log2FoldChange	p-value	padj	Gene description	TF family
Ethylene signaling pathway	MELO3C015961.2	4244.03	6556.57	4881.72	1501.19	1486.85	1636.04	5227.44	1541.36	1.76162	6.11998e-33	7.90876e-30	Ethylene receptor	HATPase_c
	MELO3C003696.2	1854.34	2705.23	2292.69	1430.52	1387.05	1483.22	2284.09	1433.6	0.671509	8.61921e-07	3.24872e-05	EIN3-binding F box protein 1	-
	MELO3C004498.2	592.937	1238.96	727.671	412.902	450.129	490.812	853.19	451.281	0.917934	4.14504e-05	0.000869977	EIN3-binding F box protein 1	-
	MELO3C010335.2	251.148	292.399	254.158	78.7442	61.1035	71.0149	265.902	70.2875	1.91858	9.31189e-21	3.0631e-18	EIN3-binding F-box 1-like protein	-
	MELO3C015210.2	798.765	885.735	864.769	567.362	534.656	519.577	849.756	540.532	0.652612	1.49463e-08	8.32025e-07	ETHYLENE INSENSITIVE 3-like 3 protein	EIN3
	MELO3C019931.2	1853.4	3093.67	2353.86	1177.12	1095.79	1154.22	2433.64	1142.38	1.09073	1.45818e-11	1.46563e-09	Protein ETHYLENE INSENSITIVE 3	EIN3
	MELO3C012896.2	138.793	1822.69	404.965	10.0954	7.12874	11.686	788.817	9.63672	6.35334	9.66214e-10	6.64667e-08	ethylene-responsive transcription factor 1B-like	AP2
	MELO3C006430.2	757.222	2666.81	1398.39	40.3816	16.2943	38.6537	1607.47	31.7765	5.65924	1.01515e-18	2.62372e-16	ethylene-responsive transcription factor 1B	AP2
	MELO3C022985.2	197.331	474.882	285.796	13.124	26.4782	26.9677	319.336	22.19	3.84159	9.72291e-28	7.64812e-25	ethylene-responsive transcription factor 1B-like	AP2
IAA signaling pathway	MELO3C003035.2	805.374	1141.85	887.97	772.299	669.083	679.586	945.065	706.989	0.418277	0.00498679	0.0358564	Auxin influx transporter	Aa_trans
	MELO3C003473.2	682.633	878.265	731.89	314.977	283.113	357.771	764.262	318.62	1.26041	9.75475e-17	2.05213e-14	Auxin-responsive protein	-
	MELO3C006476.2	1978.03	2797	2694.49	1459.8	1586.65	1972.24	2489.84	1672.9	0.57309	0.000196488	0.00310197	Auxin-responsive protein	-
	MELO3C025308.2	188.833	201.691	269.977	116.097	93.692	119.557	220.167	109.782	1.00165	5.54793e-06	0.000156588	auxin-responsive protein IAA16-like	-
	MELO3C007597.2	2893.87	3197.18	3158.51	2502.65	2550.05	2117.86	3083.19	2390.19	0.367485	0.000522294	0.0067303	Indole-3-acetic acid-amido synthetase GH3.3	-
	MELO3C024553.2	24.5483	40.5517	30.5833	2.01908	5.09196	6.29246	31.8944	4.46783	2.8211	1.01454e-05	0.000268349	auxin-induced protein X15	Auxin_inducible
	MELO3C006771.2	152.955	251.847	129.715	95.9064	84.5265	100.679	178.173	93.7041	0.925163	0.000716544	0.00860233	auxin-responsive protein SAUR36-like	Auxin_inducible
	MELO3C002378.2	13.2183	77.902	20.0373	11.105	2.03678	8.98923	37.0525	7.37699	2.32112	0.00218197	0.0198473	auxin-responsive protein SAUR71-like	Auxin_inducible
	MELO3C022337.2	204.884	402.316	214.083	137.298	109.986	133.041	273.761	126.775	1.10897	3.20894e-05	0.000710259	auxin-responsive protein SAUR36	Auxin_inducible
SA signaling pathway	MELO3C016187.2	939.446	1229.36	1073.58	639.04	898.221	700.261	1080.79	745.841	0.535048	0.000562433	0.00713072	Regulatory protein NPR1	BTB
	MELO3C021795.2	717.567	932.689	796.22	545.152	672.138	638.235	815.492	618.509	0.39811	0.00506413	0.0362135	Regulatory protein NPR1	BTB
	MELO3C018538.2	155.788	294.533	176.118	58.5534	105.913	95.2858	208.813	86.584	1.268	1.9795e-05	0.000471226	pathogenesis-related protein 1-like	SCP
ABA signaling pathway	MELO3C013082.2	1304.84	2442.71	1684.19	1000.46	843.228	991.512	1810.58	945.065	0.937474	7.35791e-07	2.86675e-05	Protein phosphatase 2c	PP2C
	MELO3C008887.2	2051.67	2705.23	2371.79	1854.53	1791.35	1801.44	2376.23	1815.77	0.387761	0.000896774	0.0102221	Serine/threonine-protein kinase	Pkinase
	MELO3C018394.2	89.6958	106.715	110.733	27.2576	23.423	54.8343	102.381	35.1716	1.53159	1.35957e-05	0.000343058	Abscisic acid receptor	-
	MELO3C013854.2	830.867	960.435	993.429	763.213	703.709	739.814	928.244	735.578	0.334931	0.00461043	0.0337974	Abscisic acid receptor	-
	MELO3C026019.2	441.87	355.361	464.022	175.66	239.322	240.012	420.418	218.332	0.944778	2.0659e-07	9.22869e-06	Abscisic acid receptor	-
	MELO3C008314.2	26.4367	39.4846	25.3103	10.0954	7.12874	0	30.4105	5.74138	2.42583	0.000886849	0.0101421	Abscisic acid receptor PYL4	-
	MELO3C006033.2	1201.92	1523.89	1354.1	997.427	871.743	1013.09	1359.97	960.752	0.500582	6.15135e-05	0.00120957	Abscisic acid receptor PYL9	-
	MELO3C026930.2	3292.31	4429.74	3737.49	3147.75	2765.95	2984.42	3819.85	2966.04	0.364752	0.0027473	0.0234012	Abscisic acid receptor PYL8	-
JA signaling pathway	MELO3C006046.2	1391.7	1785.34	1488.03	1024.68	1083.57	995.108	1555.03	1034.45	0.587872	1.28165e-06	4.54658e-05	jasmonic acid-amido synthetase JAR1	-
	MELO3C003412.2	1341.66	2077.74	1764.34	1258.9	1060.15	1126.35	1727.91	1148.46	0.588915	0.000137508	0.00231783	transcription factor MYC2-like	HLH
Flavonoid biosynthesis	MELO3C014767.2	5373.25	8038.84	7679.57	3676.75	3274.13	3055.44	7030.55	3335.44	1.07572	2.18179e-13	2.96789e-11	Chalcone synthase	Chal_sti_synt_N
	MELO3C035229.2	4169.44	5146.86	4933.4	3066.99	2932.97	2743.51	4749.9	2914.49	0.704605	5.28371e-11	4.70901e-09	Flavanone-3-hydroxylase	2OG-FeII_Oxy
	MELO3C025484.2	3786.11	4606.89	4305.92	2605.63	2979.81	2829.81	4232.97	2805.08	0.593439	2.40604e-08	1.31115e-06	chalcone--flavonone isomerase	-
	MELO3C017219.2	1939.32	2560.09	3029.85	1464.84	1518.42	1187.48	2509.76	1390.25	0.852255	1.00239e-07	4.82322e-06	Flavonoid 3' hydroxylase	p450
	MELO3C019585.2	3011.89	4924.9	3793.38	2744.94	2867.79	2534.06	3910.06	2715.6	0.525796	0.00069207	0.00838642	Cytochrome P450 family cinnamate 4-hydroxylase	p450
Catbon metabolism	MELO3C021201.2	2390.63	12440.8	4697.17	956.035	971.546	860.269	6509.55	929.283	2.80836	3.21524e-05	0.000710259	Cysteine synthase	PALP
	MELO3C015407.2	9491.71	46970.6	17697.2	4265.31	4125.5	3759.3	24719.8	4050.04	2.60966	8.90201e-05	0.00164475	Malic enzyme	Malic_M
	MELO3C009956.2	1184.93	6438.12	1697.9	729.898	787.217	629.246	3106.98	715.454	2.11857	0.00395748	0.0303256	formate dehydrogenase	2-Hacid_dh_C
	MELO3C024900.2	390.885	1214.42	501.988	257.433	274.966	271.475	702.43	267.958	1.39011	0.00568256	0.0395723	Serine acetyltransferase	Hexapep
	MELO3C019243.2	163.341	510.098	216.192	136.288	134.428	101.578	296.544	124.098	1.25654	0.000231346	0.00356821	isocitrate lyase	-
	MELO3C005310.2	2044.12	3924.98	2230.47	1062.04	1221.05	1229.73	2733.19	1170.94	1.22281	0.000147592	0.00244751	Ribose-5-phosphate isomerase A	Rib_5-P_isom_A
	MELO3C008985.2	1798.64	3629.38	2236.8	1344.71	1283.17	1150.62	2554.94	1259.5	1.02032	3.93168e-07	1.63899e-05	Glucose-6-phosphate 1-dehydrogenase	G6PD_C
	MELO3C018724.2	5885.94	9365.31	8028.64	4148.2	4258.91	3392.53	7759.96	3933.22	0.980346	3.63612e-10	2.75249e-08	Phosphoenolpyruvate carboxylase	-
	MELO3C006585.2	836.532	1297.65	693.924	573.419	371.713	492.61	942.703	479.247	0.975633	8.68415e-06	0.000235263	Pyruvate	-
	MELO3C025076.2	6954.73	13217.7	8450.48	4991.17	5867.97	5107.68	9540.98	5322.27	0.842073	0.00430207	0.032189	Isocitrate dehydrogenase [NADP]	-
	MELO3C022063.2	2131.93	4067.98	2597.47	1574.88	1926.8	1538.96	2932.46	1680.21	0.803366	3.54294e-05	0.000765817	6-phosphogluconate dehydrogenase	NAD_binding_2
	MELO3C018966.2	1268.96	2009.44	1419.49	899.501	1044.87	773.074	1565.96	905.815	0.789838	5.76492e-06	0.000161955	ATP-dependent 6-phosphofructokinase	PFK
	MELO3C007621.2	820.481	868.66	782.51	470.446	532.619	478.227	823.884	493.764	0.738934	6.9834e-10	5.03361e-08	Formamidase	FmdA_AmdA
	MELO3C013000.2	9619.17	13118.5	11021.6	7902.69	6723.42	6962.16	11253.1	7196.09	0.644983	2.02825e-07	9.08294e-06	Malic enzyme	Malic_M
	MELO3C006703.2	1135.83	1931.54	1516.51	975.217	970.527	1004.1	1527.96	983.28	0.635371	0.000137337	0.00231781	CoA ligase	AMP-binding
	MELO3C022684.2	574.053	703.252	630.648	455.303	405.32	380.244	635.985	413.622	0.620717	8.91929e-06	0.000240489	peroxisomal (S)-2-hydroxy-acid oxidase GLO4-like	FMN_dh
	MELO3C017817.2	4024.04	6188.4	4471.49	2805.51	3628.53	3183.98	4894.64	3206.01	0.610313	9.83514e-05	0.00178652	transaldolase	-
	MELO3C004545.2	1383.2	2184.46	1401.56	1098.38	1128.38	1028.37	1656.41	1085.04	0.610117	0.000269646	0.0040485	3-hydroxyisobutyryl-CoA hydrolase-like protein 3	-
	MELO3C017268.2	1215.14	2164.18	1533.38	968.15	1229.2	1037.36	1637.57	1078.24	0.602588	0.00106557	0.0115917	Enolase	-
	MELO3C017938.2	1767.48	2890.91	1723.21	1325.53	1525.55	1365.46	2127.2	1405.51	0.597686	0.000804933	0.00945639	Fumarate hydratase 1 family protein	-
	MELO3C003577.2	1870.39	3065.92	2041.7	1424.46	1825.98	1409.51	2326	1553.32	0.582428	0.00101124	0.0111979	Aspartate aminotransferase	Aminotran_1_2
	MELO3C026532.2	38324.7	49895.7	47216.4	31636	31012.1	28130	45145.6	30259.3	0.577196	3.09822e-07	1.322e-05	Catalase	Catalase
	MELO3C006234.2	1050.86	1391.56	1115.76	888.396	811.658	724.532	1186.06	808.195	0.553453	7.46721e-05	0.00142357	3-hydroxyisobutyryl-CoA hydrolase 1-like	-
	MELO3C015151.2	711.902	764.079	787.783	636.011	505.122	412.606	754.588	517.913	0.543855	0.000732114	0.00876019	Alanine:glyoxylate aminotransferase	Aminotran_5
	MELO3C023506.2	2940.14	4156.55	2932.83	2187.68	2477.75	2252.7	3343.17	2306.04	0.535682	0.000153879	0.00253069	Citrate synthase	Citrate_synt
	MELO3C017628.2	1160.38	1830.16	1205.4	908.587	1103.94	902.519	1398.65	971.681	0.525323	0.00245276	0.0215623	Glutamate dehydrogenase	-
	MELO3C006734.2	596.713	886.802	590.574	470.446	563.171	421.595	691.363	485.071	0.511352	0.00526833	0.0374076	Dihydrolipoyl dehydrogenase	Pyr_redox_2
	MELO3C018583.2	1933.65	2293.31	2160.87	1589.02	1423.71	1516.48	2129.28	1509.74	0.49571	2.70853e-06	8.52884e-05	Methylmalonate-semialdehyde dehydrogenase	Aldedh
	MELO3C026972.2	1105.62	1450.26	1089.4	927.768	864.614	800.041	1215.09	864.141	0.491695	0.000391763	0.00542293	3-hydroxyisobutyryl-CoA hydrolase-like protein	-
	MELO3C019711.2	1464.4	1943.28	1400.5	1054.97	1276.04	1101.18	1602.73	1144.07	0.486259	0.000757252	0.00898964	Citrate synthase	Citrate_synt
	MELO3C011104.2	2487.88	3572.82	2842.14	2108.93	2417.66	2012.69	2967.61	2179.76	0.445044	0.00143409	0.0144303	Glucose-6-phosphate isomerase	-
	MELO3C017560.2	4336.56	5249.31	4600.15	3286.06	3841.37	3324.22	4728.67	3483.88	0.44071	5.8554e-05	0.00115904	Succinate dehydrogenase [ubiquinone] flavoprotein subunit	-
	MELO3C022699.2	1778.81	2247.42	1752.74	1318.46	1564.25	1389.73	1926.32	1424.15	0.435626	0.000671805	0.00819575	Alanine aminotransferase 2	Aminotran_1_2
	MELO3C024500.2	2239.56	2833.28	2501.5	1875.73	1938	1796.95	2524.78	1870.22	0.432779	9.61084e-05	0.00175282	Threonine dehydratase	PALP
	MELO3C007969.2	844.085	1300.86	1068.31	821.766	753.61	812.626	1071.08	796.001	0.427444	0.00572243	0.0397581	serine acetyltransferase 2	Hexapep
	MELO3C017023.2	2081.89	2715.9	2318	1852.51	1765.89	1693.57	2371.93	1770.66	0.421592	0.000338087	0.00482614	Catalase	Catalase
	MELO3C004430.2	1880.78	2551.56	2413.97	1763.67	1719.05	1660.31	2282.1	1714.34	0.412404	0.0010094	0.01119	NADP-dependent glyceraldehyde-3-phosphate dehydrogenase	Aldedh
	MELO3C025791.2	3865.42	5077.5	4457.78	3026.6	3753.79	3454.56	4466.9	3411.65	0.388638	0.00188217	0.0177078	D-3-phosphoglycerate dehydrogenase	2-Hacid_dh_C
	MELO3C019405.2	847.862	1113.04	950.191	763.213	711.856	769.478	970.363	748.182	0.374296	0.00396251	0.0303385	Peroxisomal fatty acid beta-oxidation multifunctional protein aim1	3HCDH_N
	MELO3C010754.2	2729.59	3476.78	3545.55	2681.34	2688.55	2223.94	3250.64	2531.28	0.360848	0.0050161	0.0359982	glycine dehydrogenase (Decarboxylating)	-
	MELO3C022343.2	5614.96	7376.14	6054.44	4763.01	5295.64	4784.07	6348.51	4947.57	0.359625	0.00205819	0.0189693	Pyruvate dehydrogenase E1 component subunit beta	-
	MELO3C006261.2	2154.59	2568.63	2200.94	1899.96	1763.85	1762.79	2308.05	1808.87	0.351448	0.000868361	0.00998691	Malic enzyme	Malic_M
	MELO3C019789.2	2493.54	3244.14	2616.45	2165.47	2381	2025.27	2784.71	2190.58	0.346182	0.0051777	0.0368945	Pyruvate dehydrogenase E1 component subunit alpha	-
	MELO3C022495.2	4066.53	5468.08	4641.28	3518.25	4193.74	3487.82	4725.29	3733.27	0.339905	0.00778319	0.0497327	Non-specific serine/threonine protein kinase	Pkinase
	MELO3C015653.2	3021.33	3552.54	3487.55	2854.98	2668.19	2506.2	3353.81	2676.46	0.325421	0.0016837	0.0162635	formate--tetrahydrofolate ligase	-
	MELO3C005348.2	3399.94	4073.31	4051.76	2896.37	3434.02	2888.24	3841.67	3072.88	0.322092	0.00487195	0.0352285	Phosphoenolpyruvate carboxylase protein	-
	MELO3C005909.2	2043.18	2506.74	2334.88	1796.98	1956.33	1770.88	2294.93	1841.4	0.317467	0.0035713	0.0281714	6-phosphogluconolactonase	-
	MELO3C025454.2	1564.48	1731.98	1546.04	1291.2	1356.5	1249.5	1614.17	1299.07	0.31337	0.00181901	0.0172482	2-oxoglutarate dehydrogenase E1 component family protein	-
	MELO3C010045.2	1575.81	1444.92	1766.45	2336.08	1979.75	1985.72	1595.73	2100.52	-0.396407	0.000736541	0.00877833	Phosphoglycolate phosphatase-like protein	-
	MELO3C009351.2	538.175	329.749	409.183	640.049	592.704	584.3	425.703	605.684	-0.506971	0.00376734	0.0292151	Phosphoglycerate kinase	-
	MELO3C003386.2	1748.6	1323.27	1759.07	3332.5	2107.05	2235.62	1610.31	2558.39	-0.667632	0.000127324	0.00219385	glycine cleavage system H protein	-
	MELO3C014574.2	1340.72	784.355	1085.18	1510.27	1864.68	2056.74	1070.08	1810.56	-0.758284	2.43198e-05	0.000560501	Phosphotransferase	-
Nitrogen metabolism	MELO3C011976.2	330.458	916.682	477.732	171.622	186.366	142.03	574.957	166.672	1.78646	8.01129e-05	0.00151295	high affinity nitrate transporter 2.5	MFS_1
	MELO3C007621.2	820.481	868.66	782.51	470.446	532.619	478.227	823.884	493.764	0.738934	6.9834e-10	5.03361e-08	Formamidase	FmdA_AmdA
	MELO3C009759.2	2640.83	3859.88	3042.51	2347.18	2096.87	1970.44	3181.08	2138.16	0.573048	4.97021e-05	0.00101262	Glutamate synthase	GATase_2
	MELO3C017628.2	1160.38	1830.16	1205.4	908.587	1103.94	902.519	1398.65	971.681	0.525323	0.00245276	0.0215623	Glutamate dehydrogenase	-
	MELO3C020230.2	21973.6	22517.9	21211.1	15776.1	17896.2	16050.3	21900.9	16574.2	0.402073	2.908e-06	9.07096e-05	Glutamine synthetase	-
	MELO3C019505.2	871.466	932.689	1102.05	1300.29	1406.4	1197.37	968.736	1301.35	-0.425979	0.000684259	0.00830847	Ferredoxin--nitrite reductase family protein	-
	MELO3C022772.2	425.819	525.038	595.847	842.967	710.837	591.491	515.568	715.098	-0.472215	0.00549848	0.0385991	Nitrate reductase	NAD_binding_1
	MELO3C024476.2	117.077	130.192	105.46	145.374	189.421	220.236	117.576	185.01	-0.655767	0.00358315	0.0282099	alpha carbonic anhydrase 7-like	-
	MELO3C009958.2	165.229	107.782	183.5	469.437	208.77	229.225	152.17	302.477	-0.989924	0.00103873	0.0113895	Carbonic anhydrase	-
Tryptophan metabolism	MELO3C004383.2	718.511	1937.94	746.654	356.368	461.331	388.335	1134.37	402.011	1.49649	0.002225	0.0201363	Aldehyde dehydrogenase family 2 member	Aldedh
	MELO3C024345.2	4150.56	6280.18	4689.79	3230.53	3248.67	2804.64	5040.17	3094.61	0.703682	1.36674e-06	4.81071e-05	Aldehyde dehydrogenase	Aldedh
	MELO3C026532.2	38324.7	49895.7	47216.4	31636	31012.1	28130	45145.6	30259.3	0.577196	3.09822e-07	1.322e-05	Catalase	Catalase
	MELO3C006734.2	596.713	886.802	590.574	470.446	563.171	421.595	691.363	485.071	0.511352	0.00526833	0.0374076	Dihydrolipoyl dehydrogenase	Pyr_redox_2
	MELO3C023373.2	1471.96	2187.66	1803.36	1189.24	1394.18	1255.8	1820.99	1279.74	0.508534	0.00048949	0.00639412	Aspartate aminotransferase	Aminotran_1_2
	MELO3C021265.2	972.492	1372.36	1244.42	916.663	810.64	903.418	1196.42	876.907	0.447446	0.00156598	0.0154649	3-hydroxybutyryl-CoA dehydratase	ECH
	MELO3C017023.2	2081.89	2715.9	2318	1852.51	1765.89	1693.57	2371.93	1770.66	0.421592	0.000338087	0.00482614	Catalase	Catalase
	MELO3C015329.2	331.403	233.706	296.341	386.654	375.787	446.765	287.15	403.068	-0.488452	0.00424008	0.0319632	amidase 1-like	Amidase
	MELO3C026271.2	14.1625	8.5372	12.6552	46.4389	32.5885	57.5311	11.785	45.5195	-1.94671	4.54449e-05	0.000936434	tryptophan aminotransferase-related protein 2-like	-
Phenylalanine metabolism	MELO3C017810.2	29.2692	159.005	18.9827	7.06679	3.05517	0.898923	69.0858	3.67363	4.24984	2.11e-07	9.39e-06	phenylalanine ammonia-lyase-like	-
	MELO3C017811.2	34.9342	383.107	50.6206	2.01908	18.331	8.09031	156.221	9.48015	4.04327	0.00131328	0.0135461	phenylalanine ammonia-lyase-like	-
	MELO3C005577.2	930.948	2165.25	1244.42	407.855	430.78	352.378	1446.87	397.004	1.86572	7.66e-07	2.94e-05	Amine oxidase	-
	MELO3C014223.2	27.3808	58.6933	18.9827	14.1336	10.1839	8.98923	35.0189	11.1022	1.65849	0.00389349	0.0299622	phenylalanine ammonia-lyase-like	-
	MELO3C014224.2	35.8783	139.797	69.6033	27.2576	37.6805	26.0688	81.7594	30.3356	1.42918	0.00195407	0.0182609	phenylalanine ammonia-lyase-like	-
	MELO3C025786.2	2603.07	3995.41	3947.35	2411.79	2101.96	1903.02	3515.28	2138.92	0.716673	7.59e-06	0.000209041	phenylalanine ammonia-lyase-like	-
	MELO3C024724.2	1240.64	1804.55	1473.27	1026.7	989.877	776.669	1506.15	931.083	0.69403	1.08e-05	0.000284322	4-coumarate--CoA ligase 2	AMP-binding
	MELO3C014478.2	497.576	902.809	930.154	506.79	576.41	414.403	776.846	499.201	0.637805	0.00319764	0.0260359	Amine oxidase	-
	MELO3C003577.2	1870.39	3065.92	2041.7	1424.46	1825.98	1409.51	2326	1553.32	0.582428	0.00101125	0.0111979	Aspartate aminotransferase	Aminotran_1_2
	MELO3C014228.2	254.925	326.548	342.744	209.985	218.954	194.167	308.072	207.702	0.568098	0.00128882	0.0133394	phenylalanine ammonia-lyase-like	-
	MELO3C019585.2	3011.89	4924.9	3793.38	2744.94	2867.79	2534.06	3910.06	2715.6	0.525796	0.00069207	0.00838642	Cytochrome P450 family cinnamate 4-hydroxylase	p450
	MELO3C022961.2	834.643	1145.05	1033.5	685.478	827.952	629.246	1004.4	714.226	0.491872	0.0013162	0.0135607	4-hydroxyphenylpyruvate dioxygenase	Glyoxalase
	MELO3C025613.2	1052.75	1346.74	1076.74	872.243	818.787	823.413	1158.74	838.148	0.46693	0.000234314	0.0036109	Tyrosine aminotransferase	Aminotran_1_2
	MELO3C021265.2	972.492	1372.36	1244.42	916.663	810.64	903.418	1196.42	876.907	0.447446	0.00156598	0.0154649	3-hydroxybutyryl-CoA dehydratase	ECH
	MELO3C019405.2	847.862	1113.04	950.191	763.213	711.856	769.478	970.363	748.182	0.374296	0.00396251	0.0303385	Peroxisomal fatty acid beta-oxidation multifunctional protein aim1	3HCDH_N
	MELO3C017426.2	650.531	464.21	630.648	834.89	752.591	772.175	581.797	786.552	-0.434162	0.00341162	0.0272749	Macrophage migration inhibitory factor like	MIF
	MELO3C015329.2	331.403	233.706	296.341	386.654	375.787	446.765	287.15	403.068	-0.488452	0.00424008	0.0319632	amidase 1-like	Amidase
	MELO3C014480.2	2742.8	2202.6	2376	4158.3	4088.84	4010.99	2440.47	4086.05	-0.743144	9.58508e-13	1.14088e-10	Amine oxidase	-
	MELO3C026028.2	349.342	142.998	303.724	602.696	968.49	530.365	265.354	700.517	-1.39987	0.0021233	0.019421	Macrophage migration inhibitory factor like	MIF
Phenylalanine, tyrosine and tryptophan biosynthesis	MELO3C009018.2	1482.34	2209	1588.22	978.245	1066.26	956.454	1759.85	1000.32	0.814808	7.28684e-08	3.6519e-06	anthranilate synthase alpha subunit 2	-
	MELO3C003577.2	1870.39	3065.92	2041.7	1424.46	1825.98	1409.51	2326	1553.32	0.582428	0.00101124	0.0111979	Aspartate aminotransferase	Aminotran_1_2
	MELO3C006199.2	3039.27	4626.1	3600.39	2437.03	2884.09	2604.18	3755.25	2641.77	0.507235	0.000514731	0.00666131	3-phosphoshikimate 1-carboxyvinyltransferase	EPSP_synthase
	MELO3C025613.2	1052.75	1346.74	1076.74	872.243	818.787	823.413	1158.74	838.148	0.46693	0.000234314	0.0036109	Tyrosine aminotransferase	Aminotran_1_2
	MELO3C018622.2	1662.68	2093.75	1887.73	1458.79	1489.91	1314.23	1881.38	1420.97	0.404841	0.000530002	0.00681442	Phospho-2-dehydro-3-deoxyheptonate aldolase	-
	MELO3C013755.2	3181.84	4158.68	3671.05	2806.52	2963.52	2773.18	3670.52	2847.74	0.365995	0.00123438	0.0129084	3-dehydroquinate synthase	-
	MELO3C002275.2	1092.4	1177.07	1050.38	821.766	937.939	892.63	1106.62	884.112	0.323708	0.00333306	0.0268485	anthranilate phosphoribosyltransferase	Glycos_trans_3N
	MELO3C020958.2	602.378	709.655	704.47	994.398	878.872	1015.78	672.168	963.018	-0.519841	2.50327e-05	0.000574007	Shikimate kinase	SKI
	MELO3C004475.2	674.135	580.53	572.646	848.015	868.688	931.284	609.103	882.662	-0.534598	9.48979e-06	0.00025395	arogenate dehydrogenase 1	-
	MELO3C007485.2	137.848	72.5662	90.6953	193.832	164.979	188.774	100.37	182.528	-0.858722	0.000773212	0.00914311	shikimate kinase 1	SKI
	MELO3C002476.2	13.2183	2.1343	11.6006	55.5248	87.5817	132.142	8.9844	91.7494	-3.34038	7.11703e-11	6.07458e-09	Tryptophan synthase	PALP
